# Supplementary material for: Improvement of desolvation and resilience of alginate binders for Si-based anodes in a lithium ion battery by calcium-mediated cross-linking
Source: Royal Society of Chemistry journal article supplement (doi:10.1039/c4cp03499f), 2014-01-01
Supplement: c4cp03499f1.pdf [file c4cp03499f1.pdf]

Supporting Information

**Improvement of Desolvation and Resilience of Alginate  
Binders for Si-based Anode in a Lithium Ion Battery by  
Calcium-Mediated Cross-linking**

Jihee Yoon,<sup>#b</sup> Dongyeop X. Oh,<sup>#c</sup> Changshin Jo,<sup>#b</sup> Jinwoo Lee,<sup>b</sup> and Dong Soo Hwang<sup>\*a</sup>

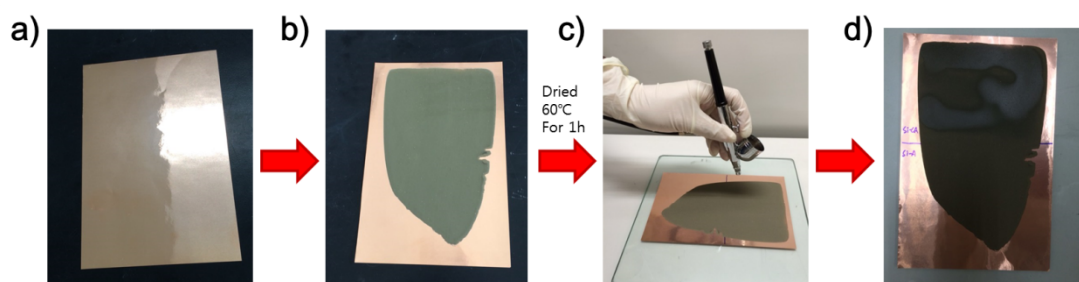

**Figure S1.** The process of spray-coating method. (a) The Cu foil was prepared. (b) The slurry (Si : Super P : alginate = 60: 20 : 20) was casted on a Cu foil using the doctor-blading technique. (c) After drying at 60 °C for 1 hour, spraying 1 wt% CaCl<sub>2</sub> solution on slurry. (d) The cast films was dried in a vacuum oven at 110 °C more than 8 hours.

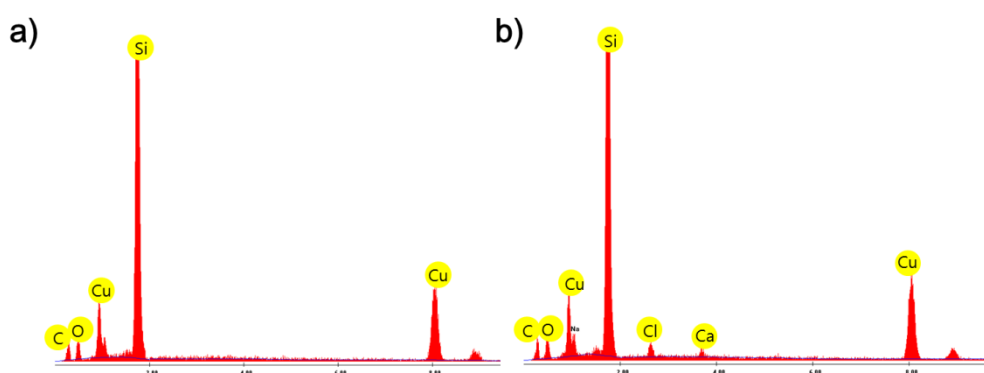

**Figure S2.** Energy-dispersive X-ray spectroscopy (EDS) spectrum of surface (a) Si-A and (b) Si-CA.

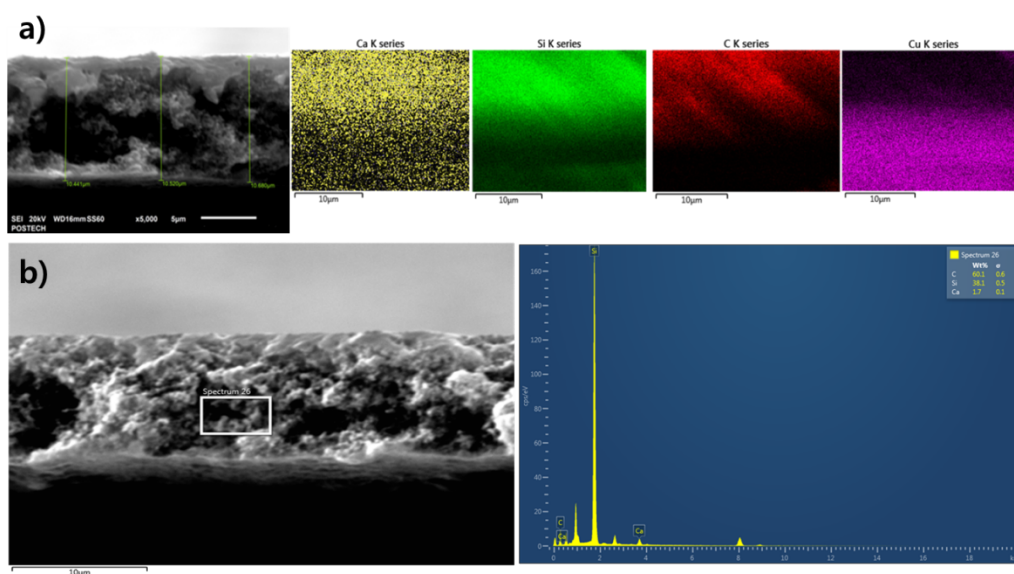

**Figure S3.** Energy-dispersive X-ray spectroscopy(EDS) (a) mapping and (b) spectrum of Si-anode with Ca-alginate binder in direction of thickness.

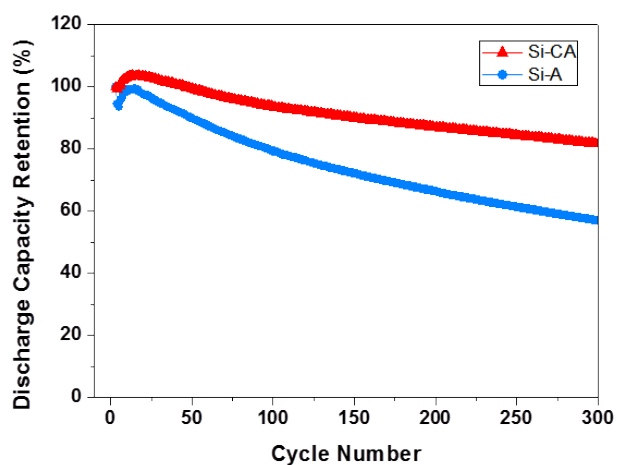

**Figure S4.** Discharge Capacity Retention plots of Si-CA and Si-A for 300cycles (at 1000 mA g<sup>-1</sup>).

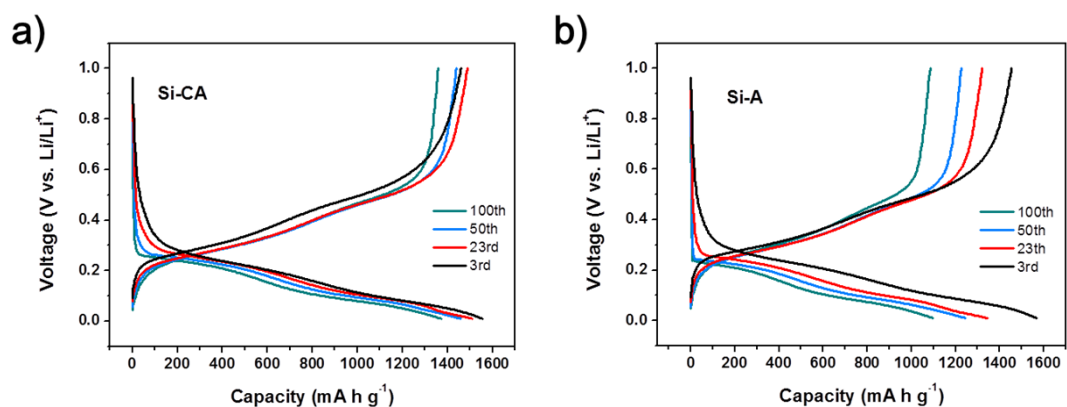

**Figure S5.** (a), (b) Charge-discharge profiles at 1000 mA g<sup>-1</sup> of Si-CA and Si-A.

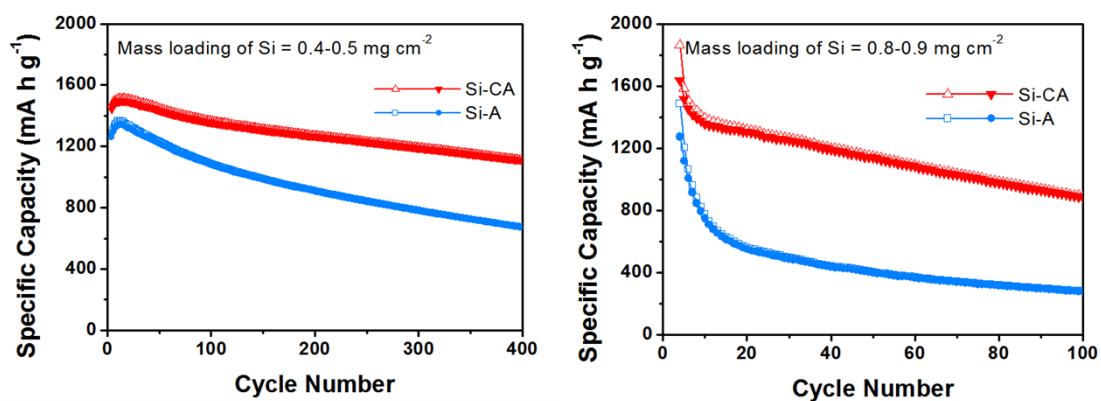

**Figure S6.** The charge capacity of Si-anodes with Ca-alginate (Si-CA) and alginate (Si-A). The mass loading of Si is (a) 0.4-0.5 mg cm<sup>-2</sup> and (b) 0.8-0.9 mg cm<sup>-2</sup>.

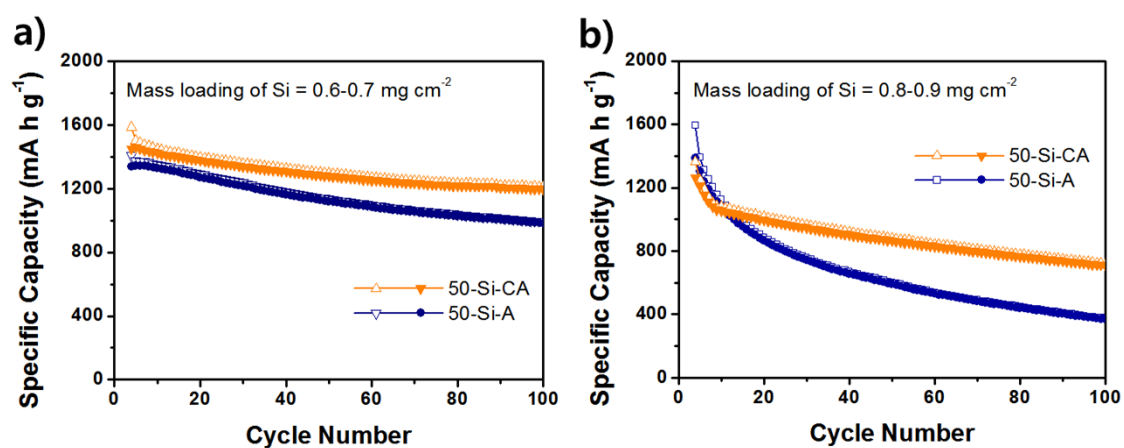

**Figure S7.** Cycle performance of Si-CA and Si-A at 50°C. The mass loading of Si was (a) 0.6-0.7 mg cm<sup>-2</sup> and (b) 0.8-0.9 mg cm<sup>-2</sup>.
